# Supplementary material
Source: publisher site journal article supplement (https://www.dovepress.com/article/380314)
Supplement: Supplementary file 1 [file get_supplementary_file.php]

**Supplementary Tables**

**Supplementary Table 1: Characteristics of AMI cases**

| **Characteristics** | **N (%)** |
| --- | --- |
| **Demographics** | |
| Age at index date, median [inter quartile range] | 75 [67-82] |
| Sex Female | 125 (50.0%) |
| Highest attained level of education |  |
| Basic secondary degree/secondary degree | 35 (14.0%) |
| Higher Education | 24 (9.6%) |
| Missing | 191 (76.4%) |
| Number of Hospital visits in previous year, median [inter quartile range] | 1 [1-2] |
| Days spent in Hospital in previous year, median [inter quartile range] | 0 [0-2] |
| Number of different ATC codes in previous year, median [inter quartile range] | 8 [3-12] |
| Obesity (ICD-10 code in last 5 years) | 60 (24.0%) |
| Smoking (ICD-10 code/dispensing indicating smoking behaviour in last 5 years) | 42 (16.8%) |
| Alcohol (ICD-10 code indicating alcohol abuse in last 5 years) | 16 (6.4%) |
| Charlson Comorbidity Index (previous year) | 3 [1-5] |
| **Cardiovascular comorbidities/risk factors** (at least one recorded diagnosis) | |
| Transient ischemic attack | 20 (8.0%) |
| Heart failure | 95 (38.0%) |
| Arrhythmia | 110 (44.0%) |
| Established cardiovascular disease | 175 (70.0%) |
| Stroke | 40 (16.0%) |
| Coronary/other arterial re-vascularisation procedures | 48 (19.2%) |
| Peripheral arterial or vascular disease | 74 (29.6%) |
| Hypercholesterolaemia, dyslipidaemia or hyperlipidaemia | 178 (71.2%) |
| Hypertension | 217 (86.8%) |
| Type 2 diabetes | 108 (43.2%) |
| Type 1 diabetes | 36 (14.4%) |
| Secondary diabetes | 89 (35.6%) |
| Ischemic heart disease (excl. AMI) | 161 (64.4%) |
| Cerebrovascular disease (excl. stroke) | 23 (9.2%) |
| Thromboembolism | 17 (6.8%) |
| Liver failure/disease | 0 (0%) |
| Chronic kidney disease | 50 (20.0%) |
| Rheumatoid arthritis | 25 (10.0%) |
| Eating disorder | 9 (3.6%) |
| **Other comorbidities/risk factors** (at least one recorded diagnosis) | |
| Cancer | 59 (23.6%) |
| Asthma | 40 (16.0%) |
| Chronic obstructive pulmonary disease | 64 (25.6%) |
| Surgery | 96 (38.4%) |
| **Drug dispensings** (at least one dispensing during previous year) | |
| Alpha blockers | 9 (3.6%) |
| Beta blockers | 123 (49.2%) |
| ACE-Inhibitors | 93 (37.2%) |
| Angiotensin-II receptor blockers | 80 (32.0%) |
| Calcium channel blockers | 71 (28.4%) |
| Antiarrhythmics | 3 (1.2%) |
| Diuretics | 86 (34.4%) |
| Anti-diabetes therapies | 52 (20.8%) |
| Insulin | 21 (8.4%) |
| Lipid lowering drugs | 99 (39.6%) |
| Low-dose aspirin | 44 (17.6%) |
| Clopidogrel | 14 (5.6%) |
| Other platelet-aggregation inhibitors | 3 (1.2%) |
| Vitamin K antagonists | 18 (7.2%) |
| Heparins | 11 (4.4%) |
| Direct thrombin inhibitors | 2 (0.8%) |
| Direct factor Xa inhibitors | 14 (5.6%) |
| Systemic glucocorticoids | 36 (14.4%) |
| Aromatase inhibitors | 0 (0%) |
| Opioids | 32 (12.8%) |
| Inhaled respiratory glucocorticoids | 25 (10.0%) |
| Anti-neoplastic agents | 4 (1.6%) |
| Immunosuppressants | 10 (4.0%) |

**Supplementary Table 2: Characteristics of stroke cases**

| **Characteristics** | **N (%)** |
| --- | --- |
| Age at index date, median [inter quartile range] | |
| Sex Female | 77 [68-83] |
| Highest attained level of education | 125 (50.0%) |
| Basic secondary degree/secondary degree |  |
| Higher Education | 29 (11.6%) |
| Missing | 21 (8.4%) |
| Number of Hospital visits in previous year, median [inter quartile range] | 200 (80.0%) |
| Days spent in Hospital in previous year, median [inter quartile range] | 1 [1-2] |
| Number of different ATC codes in previous year, median [inter quartile range] | 0 [0-2] |
| Obesity (ICD-10 code in last 5 years) | 6 [3-10] |
| Smoking (ICD-10 code/dispensing indicating smoking behaviour in last 5 years) | 66 (26.4%) |
| Alcohol (ICD-10 code indicating alcohol abuse in last 5 years) | 32 (12.8%) |
| Charlson Comorbidity Index (previous year) | 13 (5.2%) |
| **Cardiovascular comorbidities/risk factors** (at least one recorded diagnosis) | |
| Transient ischemic attack | 21 (8.4%) |
| Heart failure | 77 (30.8%) |
| Arrhythmia | 123 (49.2%) |
| Established cardiovascular disease | 128 (51.2%) |
| Stroke | 108 (43.2%) |
| Coronary/other arterial re-vascularisation procedures | 30 (12.0%) |
| Peripheral arterial or vascular disease | 61 (24.4%) |
| Hypercholesterolaemia, dyslipidaemia or hyperlipidaemia | 168 (67.2%) |
| Hypertension | 216 (86.4%) |
| Type 2 diabetes | 81 (32.4%) |
| Type 1 diabetes | 24 (9.6%) |
| Secondary diabetes | 61 (24.4%) |
| Ischemic heart disease (excl. MI) | 102 (40.8%) |
| Cerebrovascular disease (excl. stroke) | 23 (9.2%) |
| Thromboembolism | 17 (6.8%) |
| Liver failure/disease | 1 (0.4%) |
| Chronic kidney disease | 42 (16.8%) |
| Rheumatoid arthritis | 15 (6.0%) |
| Eating disorder | 5 (2.0%) |
| **Other comorbidities/risk factors** (at least one recorded diagnosis) | |
| Cancer | 64 (25.6%) |
| Asthma | 43 (17.2%) |
| Chronic obstructive pulmonary disease | 62 (24.8%) |
| Surgery | 101 (40.4%) |

| **Drug dispensings** (at least one dispensing during previous year) | |
| --- | --- |
| Alpha blockers | 6 (2.4%) |
| Beta blockers | 121 (48.4%) |
| ACE-Inhibitors | 98 (39.2%) |
| Angiotensin-II receptor blockers | 64 (25.6%) |
| Calcium channel blockers | 57 (22.8%) |
| Antiarrhythmics | 4 (1.6%) |
| Diuretics | 77 (30.8%) |
| Anti-diabetes therapies | 37 (14.8%) |
| Insulin | 18 (7.2%) |
| Lipid lowering drugs | 83 (33.2%) |
| Low-dose aspirin | 33 (13.2%) |
| Clopidogrel | 10 (4.0%) |
| Other platelet-aggregation inhibitors | 2 (0.8%) |
| Vitamin K antagonists | 27 (10.8%) |
| Heparins | 25 (10.0%) |
| Direct thrombin inhibitors | 4 (1.6%) |
| Direct factor Xa inhibitors | 24 (9.6%) |
| Systemic glucocorticoids | 26 (10.4%) |
| Other osteoporosis medications | 0 (0.00%) |
| Aromatase inhibitors | 0 (0.00%) |
| Opioids | 35 (14.0%) |
| Inhaled respiratory glucocorticoids | 19 (7.6%) |
| Anti-neoplastic agents | 3 (1.2%) |
| Immunosuppressants | 2 (0.8%) |

**Supplementary Table 3: Characteristics of CV death cases**

| **Characteristics** | **N (%)** |
| --- | --- |
| Age at index date, median [inter quartile range] | |
| Sex Female | 82 [76-89] |
| Highest attained level of education | 125 (50.0%) |
| Basic secondary degree/secondary degree |  |
| Higher Education | 7 (2.8%) |
| Missing | 10 (4.0%) |
| Number of Hospital visits in previous year, median [inter quartile range] | 233 (93.2%) |
| Days spent in Hospital in previous year, median [inter quartile range] | 2 [1-4] |
| Number of different ATC codes in previous year, median [inter quartile range] | 7 [3-13] |
| Obesity (ICD-10 code in last 5 years) | 11 [7-15] |
| Smoking (ICD-10 code/dispensing indicating smoking behaviour in last 5 years) | 65 (26.0%) |
| Alcohol (ICD-10 code indicating alcohol abuse in last 5 years) | 32 (12.8%) |
| Charlson Comorbidity Index (previous year) | 18 (7.2%) |
| **Cardiovascular comorbidities/risk factors** (at least one recorded diagnosis) | |
| Transient ischemic attack | 25 (10.0%) |
| Heart failure | 198 (79.2%) |
| Arrhythmia | 192 (76.8%) |
| Established cardiovascular disease | 179 (71.6%) |
| Stroke | 127 (50.8%) |
| Coronary/other arterial re-vascularisation procedures | 75 (30.0%) |
| Peripheral arterial or vascular disease | 89 (35.6%) |
| Hypercholesterolaemia, dyslipidaemia or hyperlipidaemia | 180 (72.0%) |
| Hypertension | 237 (94.8%) |
| Type 2 diabetes | 141 (56.4%) |
| Type 1 diabetes | 38 (15.2%) |
| Secondary diabetes | 90 (36.0%) |
| Ischemic heart disease (excl. MI) | 171 (68.4%) |
| Cerebrovascular disease (excl. stroke) | 25 (10.0%) |
| Thromboembolism | 21 (8.4%) |
| Liver failure/disease | 9 (3.6%) |
| Chronic kidney disease | 115 (46.0%) |
| Rheumatoid arthritis | 25 (10.0%) |
| Eating disorder | 16 (6.4%) |
| **Other comorbidities/risk factors** (at least one recorded diagnosis) | |
| Cancer | 103 (41.2%) |
| Asthma | 42 (16.8%) |
| Chronic obstructive pulmonary disease | 100 (40.0%) |
| Surgery | 114 (45.6%) |

| **Drug dispensings** (at least one dispensing during previous year) | |
| --- | --- |
| Alpha blockers | 11 (4.4%) |
| Beta blockers | 166 (66.4%) |
| ACE-Inhibitors | 126 (50.4%) |
| Angiotensin-II receptor blockers | 64 (25.6%) |
| Calcium channel blockers | 77 (30.8%) |
| Antiarrhythmics | 13 (5.2%) |
| Diuretics | 165 (66.0%) |
| Anti-diabetes therapies | 51 (20.4%) |
| Insulin | 26 (10.4%) |
| Lipid lowering drugs | 100 (40.0%) |
| Low-dose aspirin | 67 (26.8%) |
| Clopidogrel | 21 (8.4%) |
| Other platelet-aggregation inhibitors | 4 (1.6%) |
| Vitamin K antagonists | 52 (20.8%) |
| Heparins | 41 (16.4%) |
| Direct thrombin inhibitors | 4 (1.6%) |
| Direct factor Xa inhibitors | 52 (20.8%) |
| Systemic glucocorticoids | 53 (21.2%) |
| Other osteoporosis medications | 0 (0.0%) |
| Aromatase inhibitors | 7 (2.8%) |
| Opioids | 57 (22.8%) |
| Inhaled respiratory glucocorticoids | 35 (14.0%) |
| Anti-neoplastic agents | 16 (6.4%) |
| Immunosuppressants | 5 (2.0%) |
